# Supplementary material
Source: PubMed Central journal article supplement (PMC7093221)
Supplement: NIHMS1542132-supplement-1.pdf [file NIHMS1542132-supplement-1.pdf]

| Patient    | Eye | Age at Dx (mos) | results of clinical testing for <i>RB1</i> mutation in leukocytes | time of AH and blood sampling | AJCC TNM classification of eye | IIRC classification of eye | tumor tissue available due to enucleation | SCNA in AH? | SCNA in blood? | peak fragment size in blood (bp) without library primers | peak fragment size in AH (bp) without library primers |
|------------|-----|-----------------|-------------------------------------------------------------------|-------------------------------|--------------------------------|----------------------------|-------------------------------------------|-------------|----------------|----------------------------------------------------------|-------------------------------------------------------|
| Patient 1  | OD  | 4               | c.1666C>T                                                         | at diagnosis                  | cT1B                           | B                          | no                                        | no          | no             | 180                                                      | 162                                                   |
|            | OS  | —               | —                                                                 | at diagnosis                  | cT2B                           | D                          | no                                        | no          | no             | 180                                                      | 157                                                   |
| Patient 2  | OS  | 22              | not present                                                       | at diagnosis                  | cT2B                           | D                          | no                                        | yes         | no             | 180                                                      | 149                                                   |
| Patient 3  | OD  | 8               | not present                                                       | at diagnosis                  | cT2B                           | D                          | no                                        | yes         | no             | 178                                                      | 158                                                   |
| Patient 4  | OD  | 16              | c.1389+2T>C                                                       | at diagnosis                  | cT2B                           | D                          | no                                        | yes         | no             | 187                                                      | 149                                                   |
| Patient 5  | OS  | 10              | not present                                                       | at diagnosis                  | cT3D                           | D                          | no                                        | yes         | no             | 182                                                      | 166                                                   |
| Patient 6  | OS  | 5               | not present                                                       | at diagnosis                  | cT2A                           | C                          | no                                        | no          | no             | 178                                                      | 153                                                   |
| Patient 7  | OD  | 6               | not present                                                       | during treatment              | cT1B                           | B                          | no                                        | yes         | no             | 186                                                      | 167                                                   |
| Patient 8  | OD  | 26              | c.2520+1G>A                                                       | during treatment              | cT2A                           | C                          | no                                        | yes         | no             | 184                                                      | 165                                                   |
|            | OS  | —               | —                                                                 | during treatment              | cT2B                           | D                          | no                                        | yes         | no             | 184                                                      | 146                                                   |
| Patient 9  | OD  | 3               | familial RB                                                       | during treatment              | cT2B                           | D                          | no                                        | yes         | no             | 181                                                      | 157                                                   |
| Patient 10 | OD  | 4               | not present                                                       | during treatment              | cT2B                           | D                          | no                                        | yes         | no             | 186                                                      | 164                                                   |
| Patient 11 | OS  | 13              | not present                                                       | during treatment              | cT2B                           | D                          | no                                        | yes         | no             | 186                                                      | 158                                                   |
| Patient 12 | OD  | 9               | c.2527delG                                                        | during treatment              | cT3B                           | E                          | no                                        | no          | no             | 180                                                      | 159                                                   |
|            | OS  | —               | —                                                                 | during treatment              | cT3B                           | E                          | no                                        | no          | no             | 180                                                      | 121                                                   |
| Patient 13 | OD  | 2               | c.1421+12_1421+3<br>2del21bp                                      | during treatment              | cT2B                           | D                          | no                                        | no          | no             | 184                                                      | 165                                                   |
| Patient 14 | OD  | 45              | not present                                                       | during treatment              | cT2B                           | D                          | no                                        | no          | no             | 179                                                      | 165                                                   |
| Patient 15 | OD  | 4               | c.865A>T                                                          | during treatment              | cT2B                           | D                          | no                                        | no          | no             | 178                                                      | 155                                                   |
| Patient 16 | OS  | 13              | c.1494t>G                                                         | during treatment              | cT3C                           | E                          | no                                        | no          | no             | 188                                                      | 157                                                   |
| Patient 17 | OD  | 2               | c.2425delC                                                        | during treatment              | cT3C                           | E                          | yes                                       | yes         | no             | 185                                                      | 151                                                   |

Table 1 (supplemental): Patient and Sample Demographics

AH=aqueous humor

RB=retinoblastoma

*RB1*=retinoblastoma tumor suppressor gene

AJCC TNM=American Joint Committee on Cancer (Tumor Node Metastasis), 8<sup>th</sup> edition

IIRC: International Intraocular Retinoblastoma Classification

SCNA=somatic copy number alteration

bp=base pairs

## Patient 17

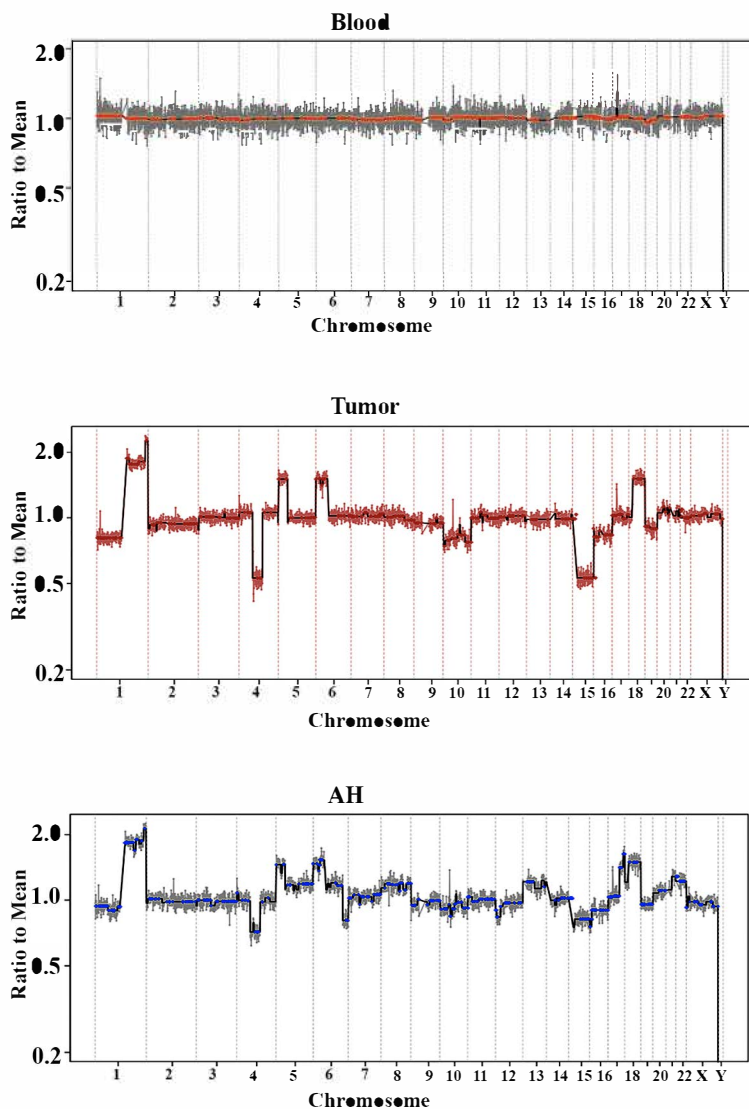

Figure 2 (supplemental): The genomic profile from the AH is concordant with the profile from the tumor  
Direct evaluation of the tumor (secondary to enucleation) was done for Patient 17. The chromosomal alterations seen in the cfDNA from the AH are concordant and consistent with those from the tumor; the cfDNA in the blood did not demonstrate any similar alterations.
